# Supplementary material
Source: publisher site journal article supplement (https://www.dovepress.com/article/264994)
Supplement: Supplementary file 1 [file get_supplementary_file.php]

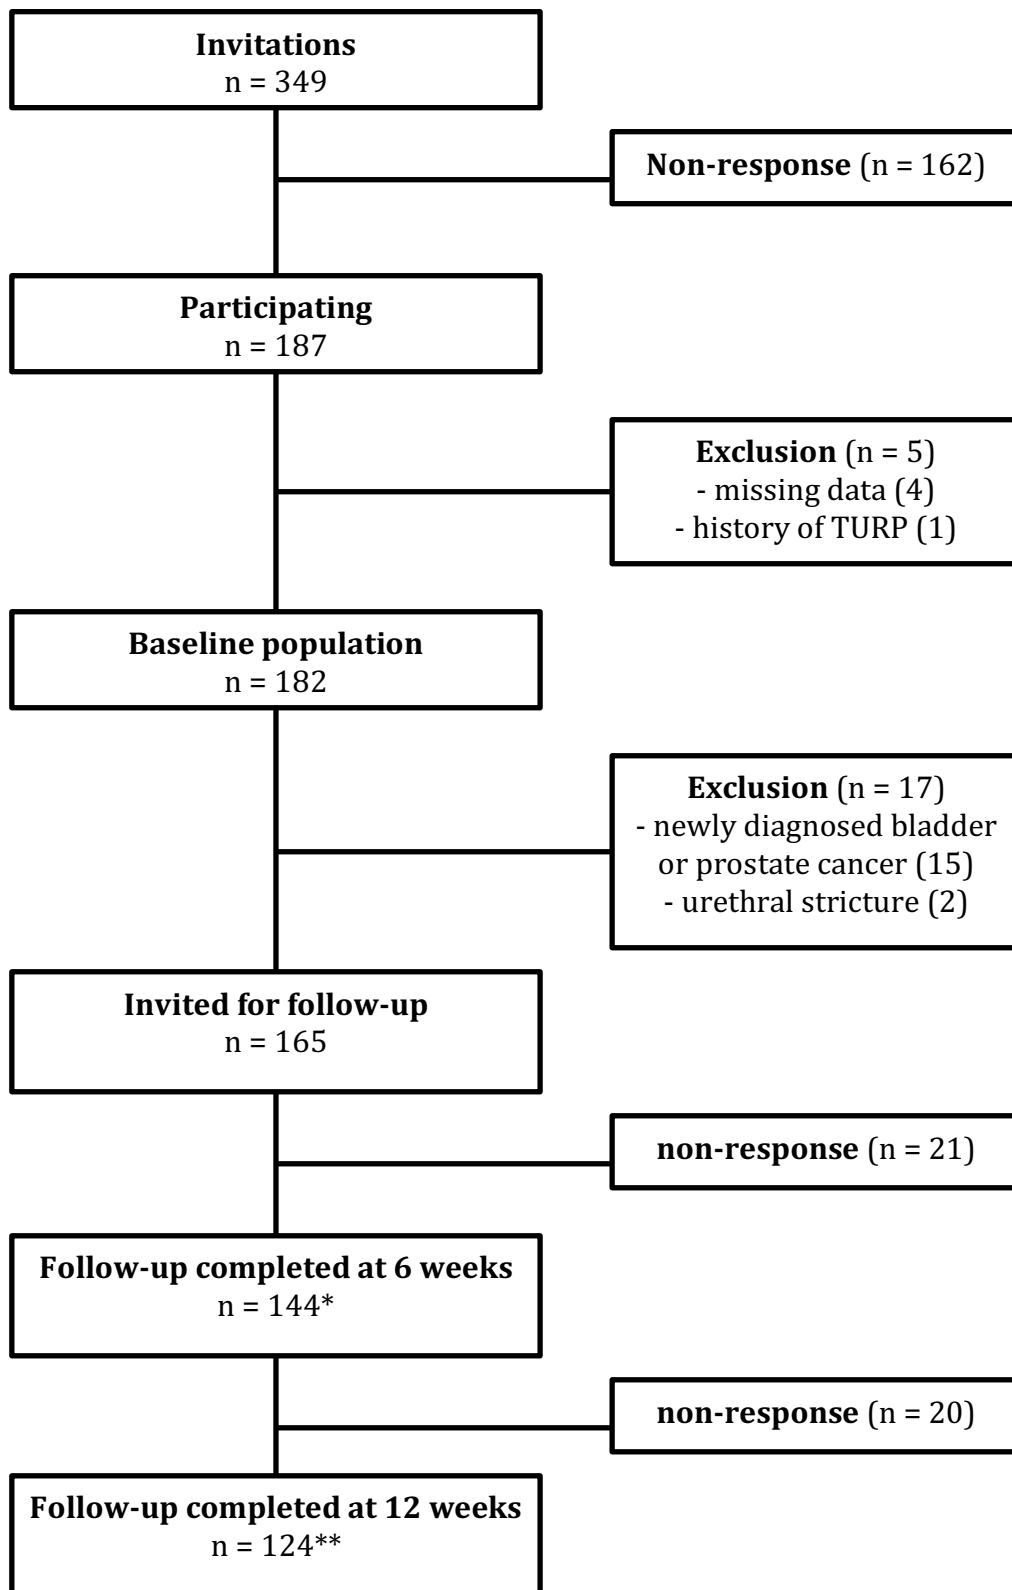

**Supplementary file 2. Flowchart of participants**

\* one participant had missing data on satisfaction about provided treatment

\*\* one participant had missing data on satisfaction and the PGI-I
